# Supplementary material for: Swept Source Optical Coherence Tomography Analysis of a Selected Eye’s Anterior Segment Parameters in Patients with Pseudoexfoliation Syndrome
Source: MDPI journal article supplement (doi:10.3390/jcm11010268), 2022-01-05
Supplement: s1 [file s1]

Table S1. Gender comparison in the PEX group for corneal. Fourier and lens parameters (Mann Whitney U test).

|            |          |          |          |           |          |           |          |          |
|------------|----------|----------|----------|-----------|----------|-----------|----------|----------|
| TILT       | 341.5000 | 693.5000 | 197.5000 | 0.465822  | 0.641343 | 0.466007  | 0.641211 | 0.636491 |
| DECEN<br>T | 304.5000 | 730.5000 | 199.5000 | -0.416789 | 0.676833 | -0.417160 | 0.676562 | 0.671520 |
| Ks         | 374.5000 | 850.5000 | 238.5000 | -0.533002 | 0.594033 | -0.533410 | 0.593750 | 0.590392 |
| Kf         | 389.0000 | 836.0000 | 253.0000 | -0.223861 | 0.822866 | -0.223969 | 0.822781 | 0.824745 |
| Ks p       | 435.5000 | 789.5000 | 228.5000 | 0.746203  | 0.455546 | 0.749923  | 0.453302 | 0.453195 |
| Kf p       | 418.0000 | 807.0000 | 246.0000 | 0.373101  | 0.709073 | 0.375776  | 0.707084 | 0.711983 |
| CCT        | 398.5000 | 876.5000 | 262.5000 | -0.187175 | 0.851523 | -0.187270 | 0.851449 | 0.845041 |
| ACD        | 491.5000 | 733.5000 | 172.5000 | 1.940127  | 0.052365 | 1.940523  | 0.052317 | 0.050366 |
| FI-3-Sph   | 382.5000 | 842.5000 | 246.5000 | -0.362441 | 0.717023 | -0.362469 | 0.717002 | 0.711983 |
| FI-3-Reg   | 417.0000 | 808.0000 | 247.0000 | 0.351781  | 0.725003 | 0.351889  | 0.724922 | 0.727781 |
| FI-3-Ass   | 449.5000 | 775.5000 | 214.5000 | 1.044684  | 0.296170 | 1.045484  | 0.295800 | 0.294658 |
| FI-3-HO    | 383.0000 | 842.0000 | 247.0000 | -0.351781 | 0.725003 | -0.353008 | 0.724083 | 0.727781 |
| FI-6-Sph   | 384.5000 | 840.5000 | 248.5000 | -0.319801 | 0.749119 | -0.319817 | 0.749107 | 0.743694 |
| FI-6-Reg   | 424.0000 | 801.0000 | 240.0000 | 0.501022  | 0.616356 | 0.501239  | 0.616203 | 0.619914 |
| FI-6-Ass   | 415.0000 | 810.0000 | 249.0000 | 0.309141  | 0.757214 | 0.309275  | 0.757112 | 0.759714 |
| FI-6-HO    | 362.0000 | 863.0000 | 226.0000 | -0.799503 | 0.424000 | -0.803903 | 0.421453 | 0.428042 |

Table S2. Gender comparison in the PEX group for the iridocorneal parameters (Mann Whitney U test).

|                      | Rank<br>Sum<br>M |          | U        | Z         | p        | Rank<br>Sum<br>M | p        | 2 side p |
|----------------------|------------------|----------|----------|-----------|----------|------------------|----------|----------|
| 180-<br>AOD-<br>250  | 362.0000         | 814.0000 | 226.0000 | -0.645178 | 0.518812 | -0.645318        | 0.518721 | 0.522818 |
| 180-<br>AOD-<br>500  | 475.5000         | 700.5000 | 172.5000 | 1.815247  | 0.069487 | 1.815345         | 0.069472 | 0.067469 |
| 180-<br>AOD-<br>750  | 474.0000         | 702.0000 | 174.0000 | 1.782441  | 0.074678 | 1.782490         | 0.074670 | 0.074480 |
| 180-<br>ARA-<br>250  | 355.5000         | 820.5000 | 219.5000 | -0.787336 | 0.431086 | -0.787678        | 0.430886 | 0.428787 |
| 180-<br>ARA-<br>500  | 406.0000         | 770.0000 | 242.0000 | 0.295251  | 0.767802 | 0.295315         | 0.767753 | 0.770224 |
| 180-<br>ARA-<br>750  | 444.5000         | 731.5000 | 203.5000 | 1.137263  | 0.255429 | 1.137510         | 0.255326 | 0.253886 |
| 180-<br>TISA-<br>250 | 367.0000         | 809.0000 | 231.0000 | -0.535826 | 0.592079 | -0.536452        | 0.591646 | 0.595797 |
| 180-<br>TISA-<br>500 | 411.0000         | 765.0000 | 237.0000 | 0.404603  | 0.685769 | 0.404647         | 0.685737 | 0.688884 |
| 180-<br>TISA-<br>750 | 456.5000         | 719.5000 | 191.5000 | 1.399708  | 0.161602 | 1.399822         | 0.161567 | 0.159947 |
| 180-TIA-<br>250      | 389.0000         | 787.0000 | 253.0000 | -0.054676 | 0.956397 | -0.054685        | 0.956389 | 0.956877 |
| 180-TIA-<br>500      | 476.5000         | 699.5000 | 171.5000 | 1.837117  | 0.066193 | 1.837217         | 0.066179 | 0.064168 |
| 180-TIA-<br>750      | 481.5000         | 694.5000 | 166.5000 | 1.946470  | 0.051599 | 1.946681         | 0.051574 | 0.049562 |

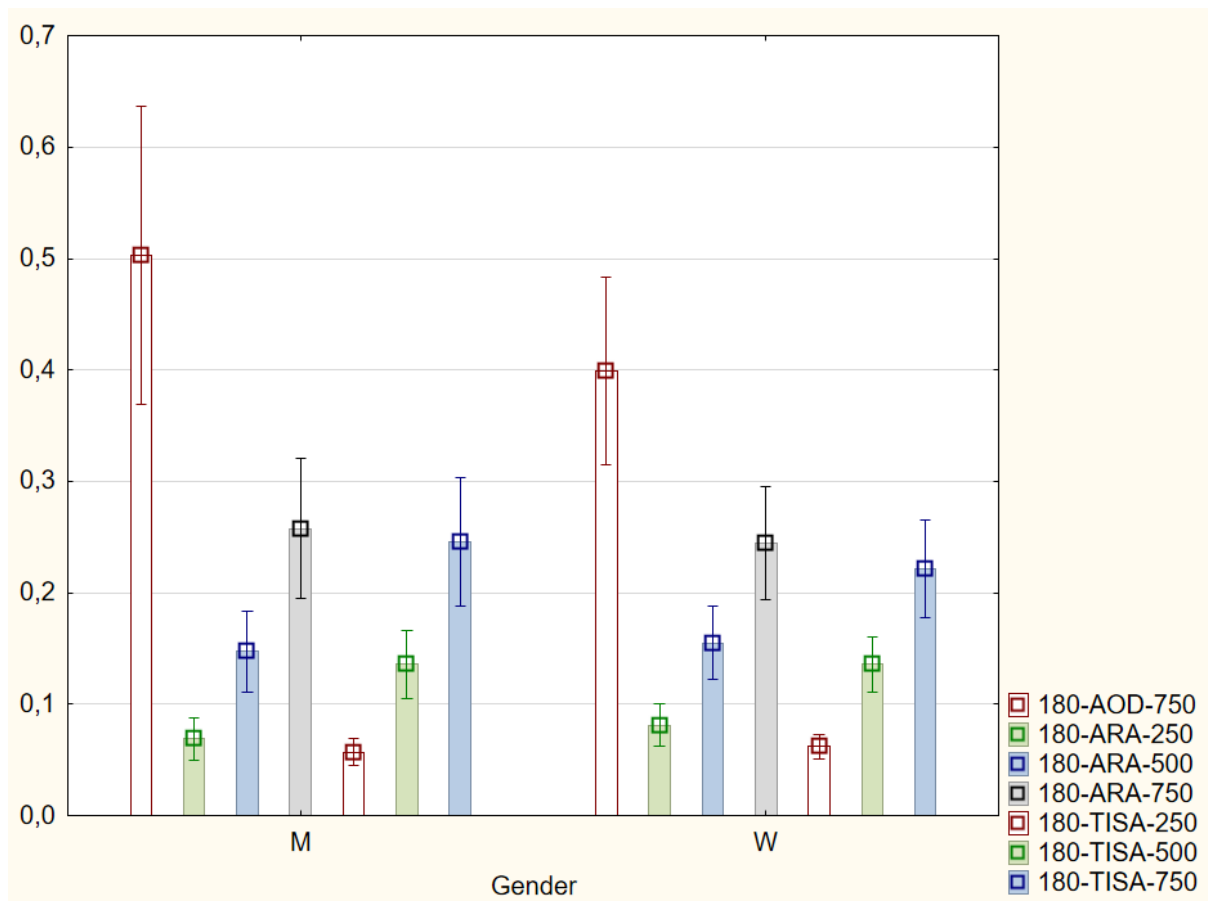

Fig. S1 Gender comparison for idiocorneal parameters.

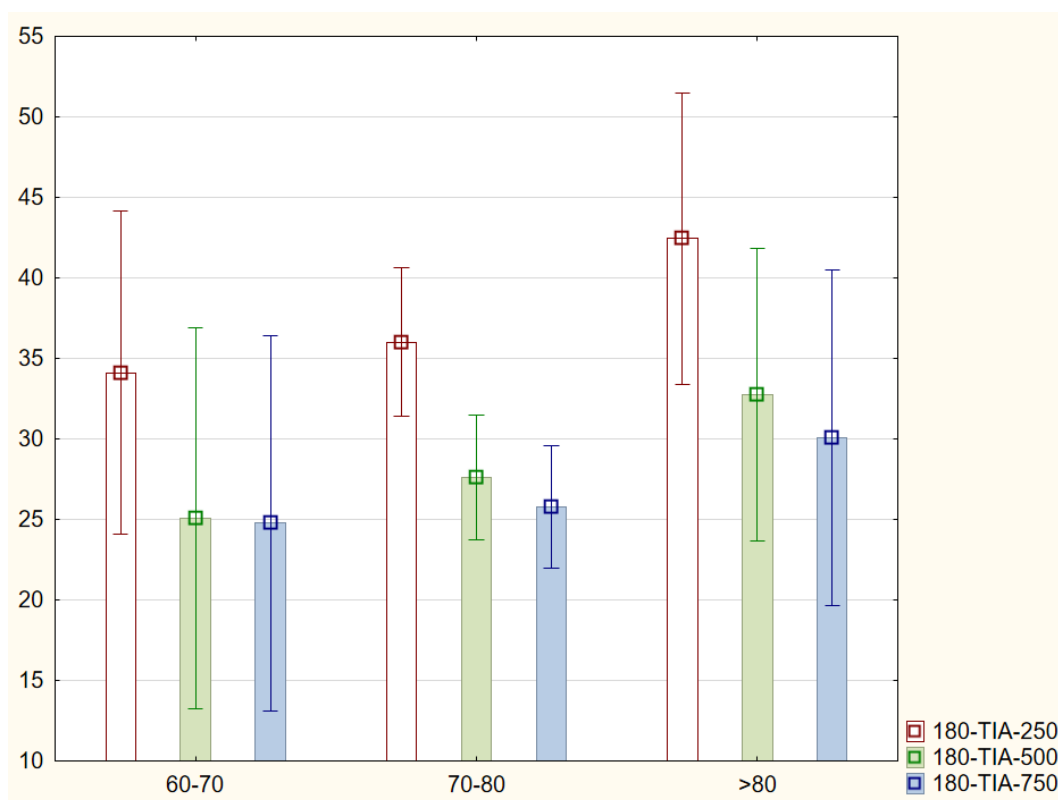

Figure S2. Age comparison for TIA (ANOVA Kruskal Wallis.  $p < 0.05$ )

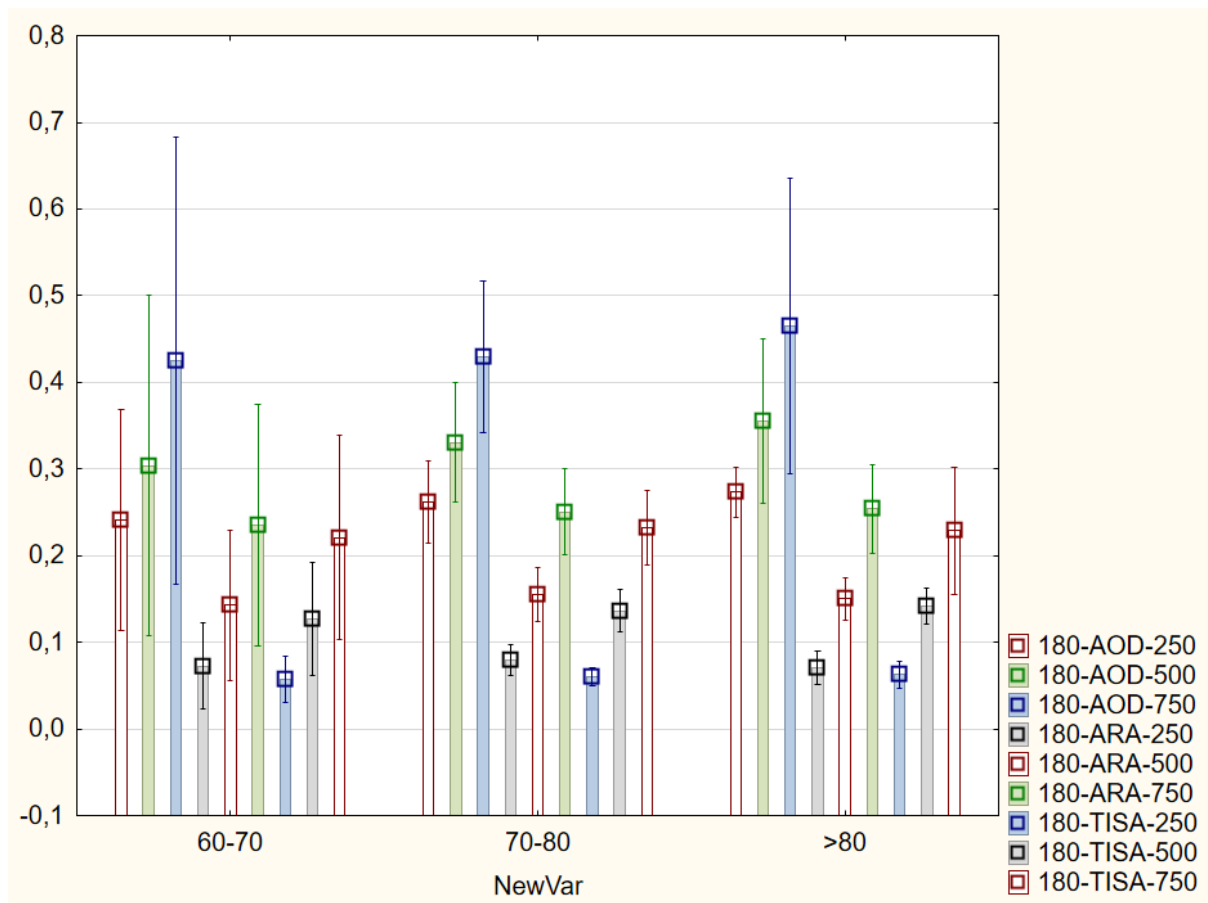

Figure S3. Age comparison for iridocorneal parameters.
